# Supplementary material for: Effects of season and sex on the concentrations of fecal glucocorticoid metabolites in captive and free-ranging endangered mountain gazelles (Gazella gazella)
Source: Front Vet Sci. 2024 Jun 5;11:1386009. doi: 10.3389/fvets.2024.1386009 (PMC11186381; doi:10.3389/fvets.2024.1386009)
Supplement: Supplementary file 1 [file Table_1.XLSX]

## Sheet: List1
Raw data of fecal glucocorticoid metabolite concentrations (ng/g) in mountain gazelle (Gazella gazella)
	FEMALE GAZELLES
	DECEMBER 2022		APRIL 2023		JULY 2023		SEPTEMBER 2023
	free ranging	captive	free ranging	captive	free ranging	captive	free ranging	captive
	24	10.55	44.75	10.5	13.95	15.25	15.45	15
	17.65	10.65	30.5	18.3	18.15	20.85	21.47	21.3
	20.05		13.7	15.45	24.2	21.25	16.5	42.4
	28.1		56.25	25.75	14.7	9.6	28	74.5
	23.85		33.35	53.75	11.3	12.35	21.95	30.7
	8.5		8.75	15.1	14.25	8.15	15	19.6
	24.5		24.75		8.1	6.5	26.57	40
	31.35		21.9		21.3	9.95	15.95	161
	18.05		19.5		35.3	16.4	16.2	42.2
	6.5		13.95		13.7	10.3	10	42.7
	7.15		75		18.95	11.15	16.02	32.9
	26.6		58.75		24.35	7.45	15.85	31.9
	4.55		8.5		13.1	7.85	12.47	55
	14.5		16.2		26.1		13.3	23.9
	20.85		12.95		94.75		22.85
	16.2		16.8		15.65		22.37
	69		12.15		28.8		28.4
	13.4		8.05		6.7		38.6
	12.85		40.4		14.85		26.7
	24.1		41.35		9.95		14.2
	16.75				9.7		29.2
					9.7		35
					8.4		43.3
					11.7		19.5
					8.5		17.1
					15.2		12.5
					16.3		19.9
					13.85		26
							27
median	18.05	10.6	20.7	16.875	14.475	10.3	19.9	36.45
min	4.55	10.55	8.05	10.5	6.7	6.5	10	15
max	69	10.65	75	53.75	94.75	21.25	43.3	161
	MALE GAZELLES
	DECEMBER 2022		APRIL 2023		JULY 2023		SEPTEMBER 2023
	free ranging	captive	free ranging	captive	free ranging	captive	free ranging	captive
	14.65	16.25	27.85	48.4	16.7	8.85	18.67	15.7
	12.85	30.65	29.7	22.5	13.75	11.7	17.92	62.7
	18	12.65	31.15	10.8	19.3	10.3	46.6	55.4
	15.6	18	22.9	16.5	16.55	19.2	18.9	29.1
	41.75	18.5	46.4	15.6	23.45	6.05	28.57	18.3
	12.7	14.7	45.3	28.65	12.55	20.55	21.4	22.1
	19.2	10.25	17.65	21.8	19	12.3	22.25	91
	18.75		13.8	30.5	15.8	14.1	14.12	25.3
	7.65		17.3	28.65	16.3	11.3	18.97
	7.5		21	14.65	17.25	6.55	14.8
	10.9		25.05	20.35	24.25	14.3	12.12
	27.05		7.4	33.1	15.55	14.7	14.17
			6.5	42.9	25.85		20
			42.2	19.4	26.2		22.8
			17.05		38.7		14.05
			21.5		17.8		10
			10.5		26.2		9.1
			23.95		12.45		31.65
			19.9		17.5		21.27
					13.2		23.9
					19		22.1
					12.75		10.22
					14.8		26.4
					8.95		42
					10.8		23.8
					16.65		27.7
							27.9
							27.7
							26
							31.7
							48
median	15.125	16.25	21.5	22.15	16.675	12	22.1	27.2
min	7.5	10.25	6.5	10.8	8.95	6.05	9.1	15.7
max	41.75	30.65	46.4	48.4	38.7	20.55	48	91
